# Supplementary material for: A Theoretical and Experimental Study of Cysteine-Based Perfluorinated Derivatives
Source: Preprints.org preprint supplement (doi:10.20944/preprints202210.0398.v1), 2022-10-26

# SUPPORTING INFORMATION

## A theoretical and experimental study of cysteine-based perfluorinated derivatives

Sisa Chalán-Gualán<sup>1</sup>, Iván Ramos-Tomillero<sup>2</sup>, Thibault Terencio<sup>1</sup>, Lola De Lima<sup>1</sup>, Daniela G. Navas-León<sup>1</sup>, Nelson Santiago Vispo<sup>3</sup>, Fernando Albericio<sup>2,4,5,6</sup> and Hortensia Rodríguez<sup>1,\*</sup>

- 1 School of Chemical Science and Engineering, Yachay Tech, Yachay City of Knowledge, Urququi, Ecuador.; [sisachalan@yachaytech.edu.ec](mailto:sisachalan@yachaytech.edu.ec), [thibault@yachaytech.edu.ec](mailto:thibault@yachaytech.edu.ec), [ldelima@yachaytech.edu.ec](mailto:ldelima@yachaytech.edu.ec), [dnavas@yachaytech.edu.ec](mailto:dnavas@yachaytech.edu.ec), [hmrodriguez@yachaytech.edu.ec](mailto:hmrodriguez@yachaytech.edu.ec)
- 2 CIBER-BBN, Networking Centre of Bioengineering, Biomaterials, and Nanomedicine.
- 3 School of Biological Science and Engineering, Yachay Tech, Yachay City of Knowledge, Urququi, Ecuador.; [nvispo@yachaytech.edu.ec](mailto:nvispo@yachaytech.edu.ec)
- 4 Department of Organic Chemistry, University of Barcelona and CIBER-BBN, 08028 Barcelona, Spain
- 5 School of Chemistry and Physics, University of KwaZulu-Natal, Durban 4001, South Africa. [Albericio@ukzn.ac.za](mailto:Albericio@ukzn.ac.za)

\* Correspondence: [hmrodriguez@yachaytech.edu.ec](mailto:hmrodriguez@yachaytech.edu.ec) (H.R.); +593-994-336-513 (H.R.)

*S*-(perfluorophenyl)-L-cysteine (C<sub>6</sub>F<sub>5</sub>-S-Cys, **1a**):

**Figure S1.** HPLC chromatogram. RP-HPLC: [linear gradient H<sub>2</sub>O/MeCN (100:0) to (40:60) over 8 min].

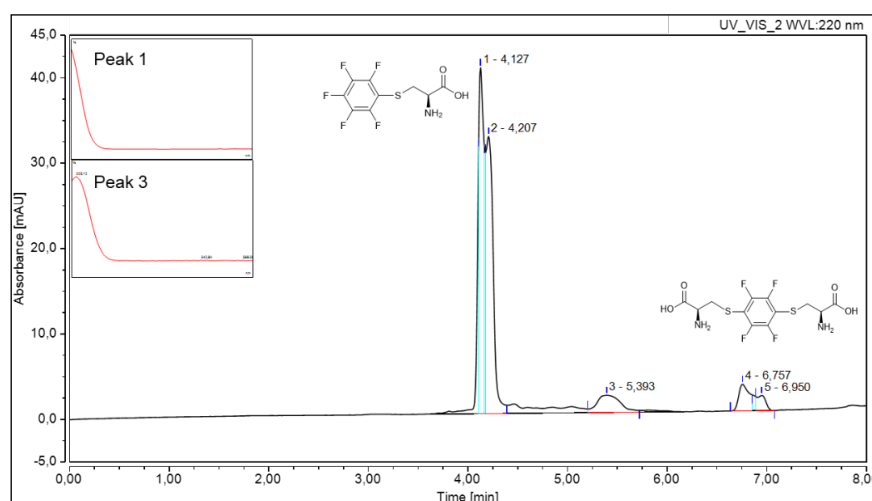

Figure S2. IR spectrum

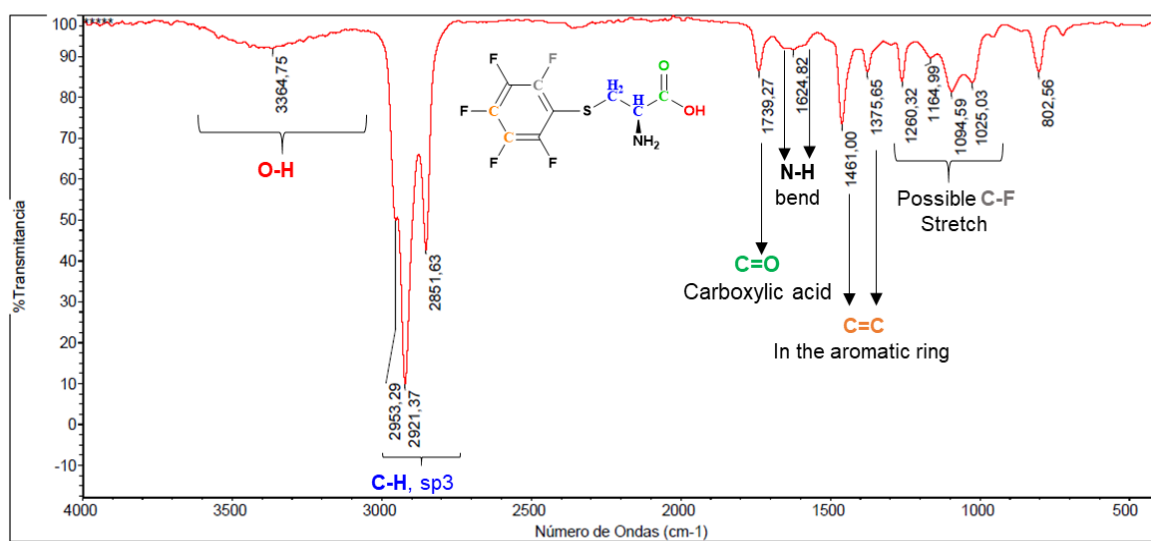

Figure S3. <sup>19</sup>F-NMR spectrum

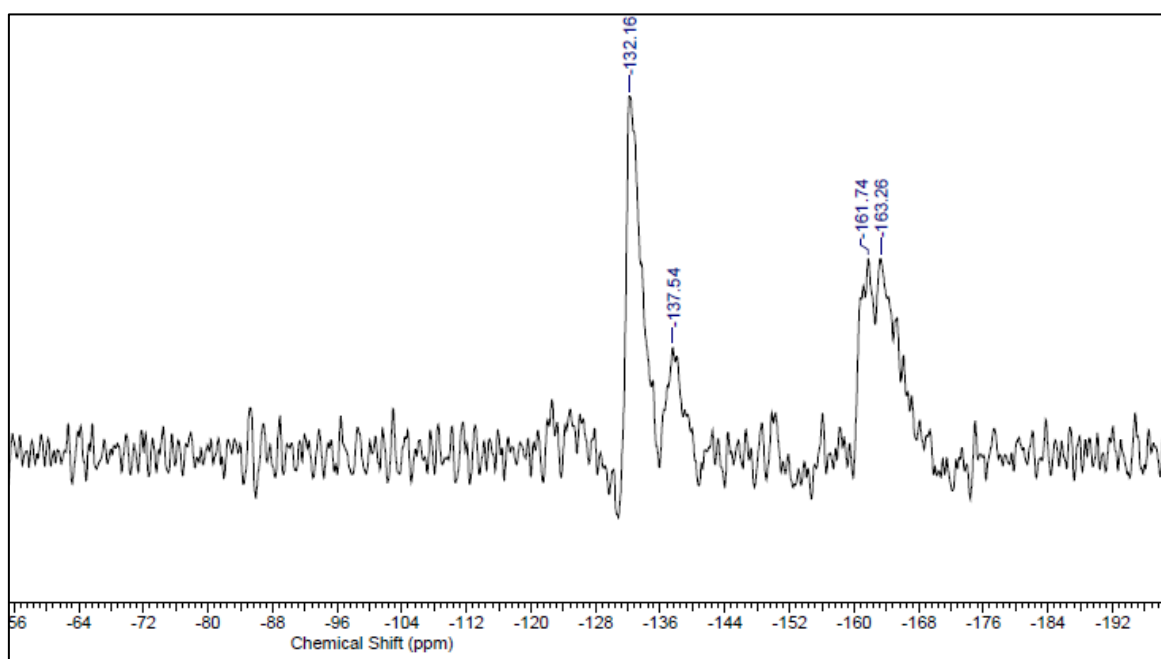

*S*-(perfluorophenyl)-L-Glutathione ( $C_6F_5$ -S-GSH, **Ib**):

**Figure S4.** HPLC chromatogram of pure product. RP-HPLC: [linear gradient H<sub>2</sub>O/MeCN (95:5) to (50:50) over 8 min]. ESI-MS spectrum.

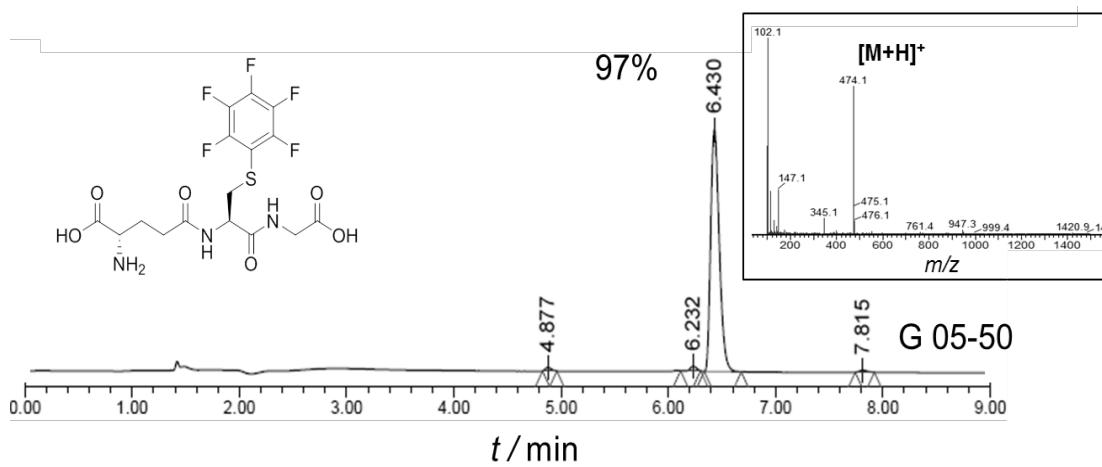

**Figure S5.** <sup>19</sup>F-NMR spectrum

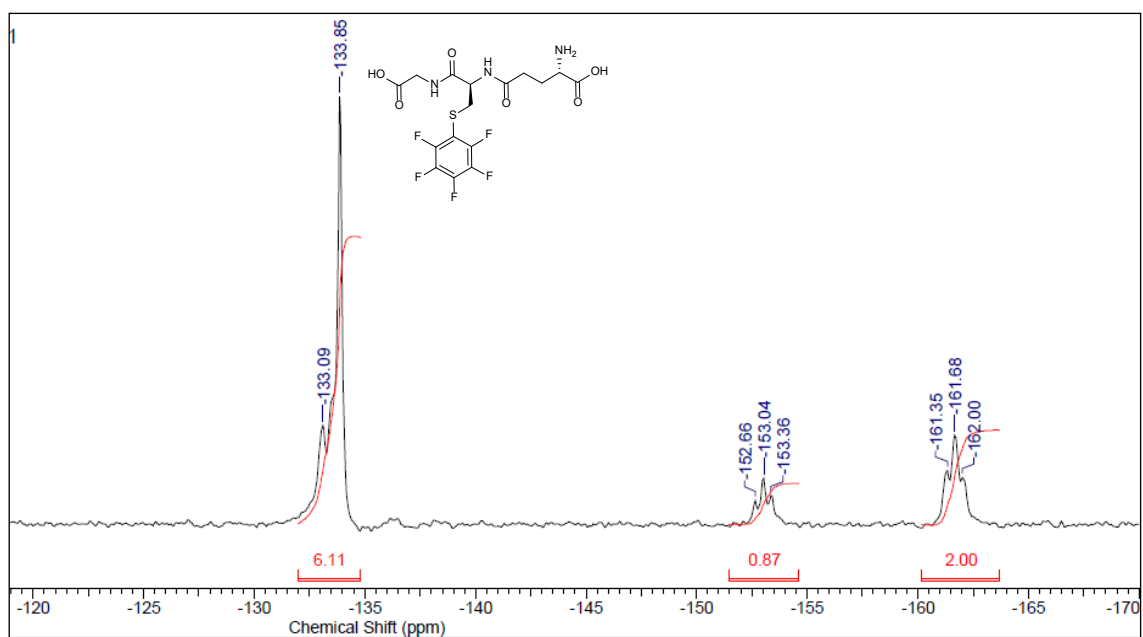

*S*-(perfluoro-[1,1'-biphenyl]-4-yl)-L-cysteine (**IIa**):

Figure S6.  $^{19}\text{F}$ -NMR spectrum

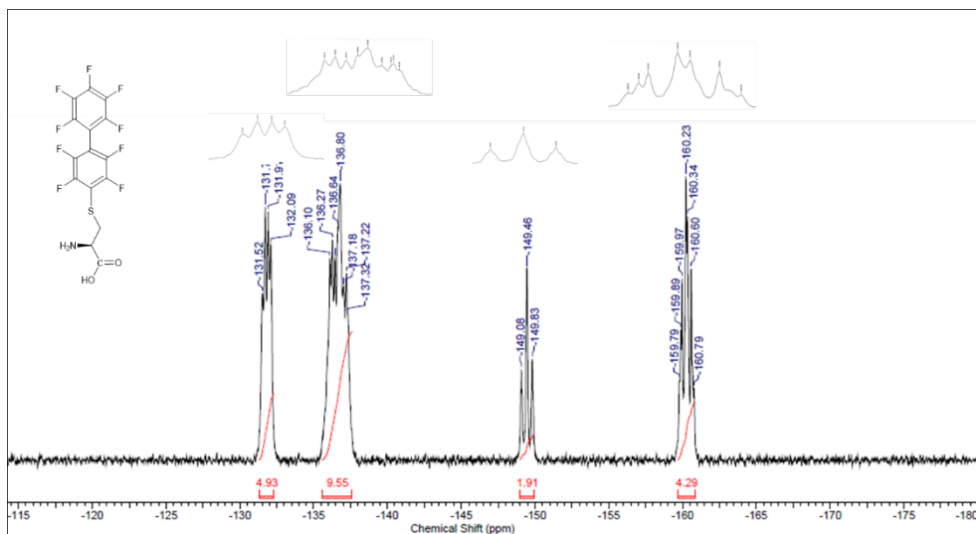

*S*-(perfluoro-[1,1'-biphenyl]-4-yl)-L-glutathione (**IIb**):

Figure S7. HPLC chromatogram. RP-HPLC: [linear gradient H<sub>2</sub>O/MeCN (100:0) to (40:60) over 8 min].

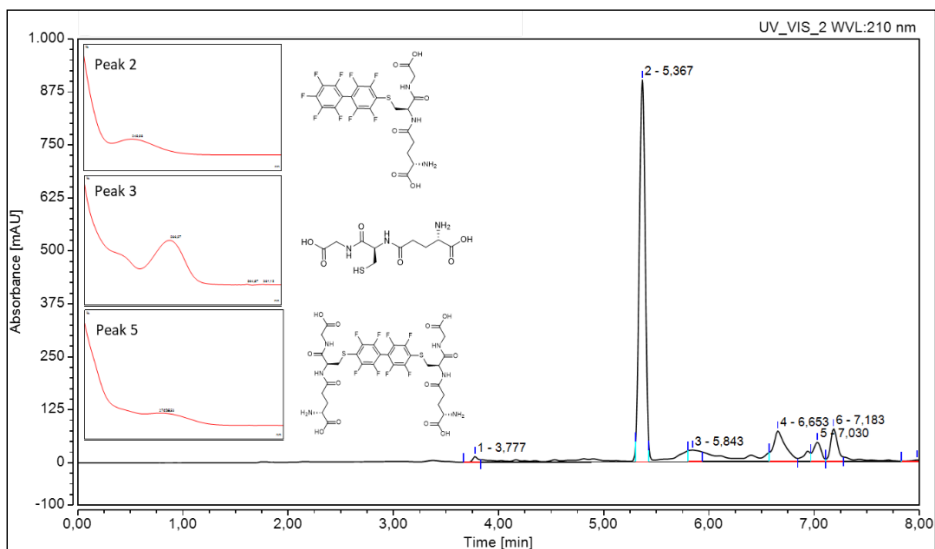

Figure S8. IR spectrum

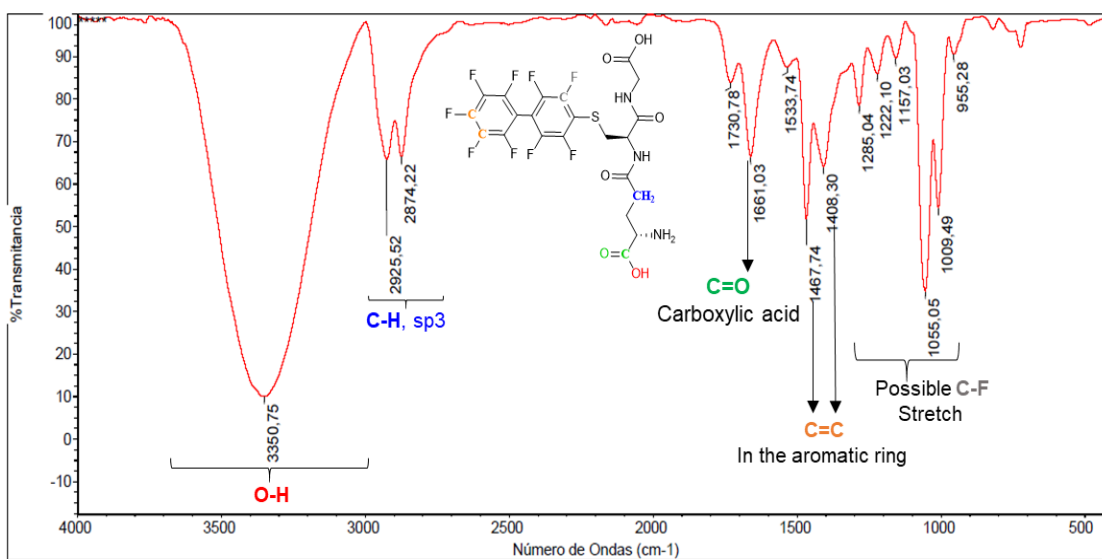

Figure S9. HPLC chromatogram of pure product. RP-HPLC: [linear gradient H<sub>2</sub>O/MeCN (95:5) to (0:100) over 8 min]. ESI-MS spectrum.

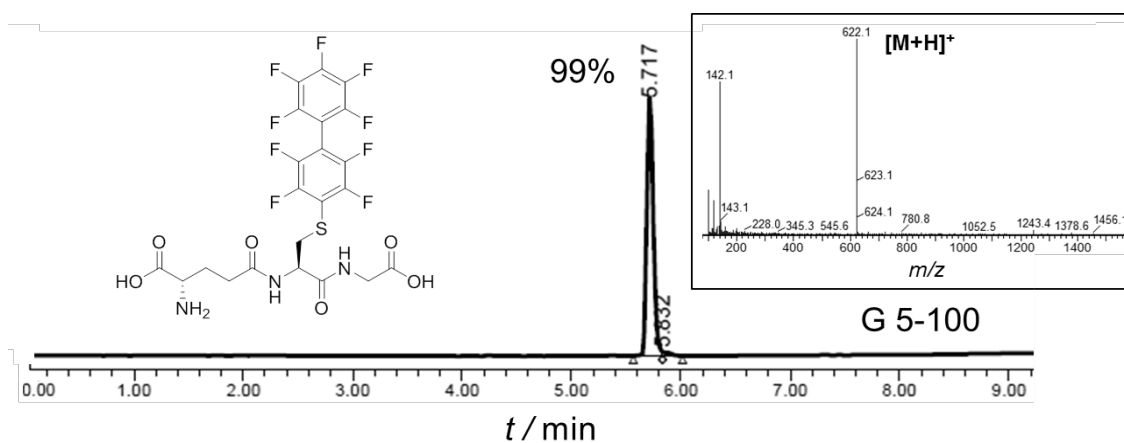

Figure S10. <sup>19</sup>F-NMR spectrum

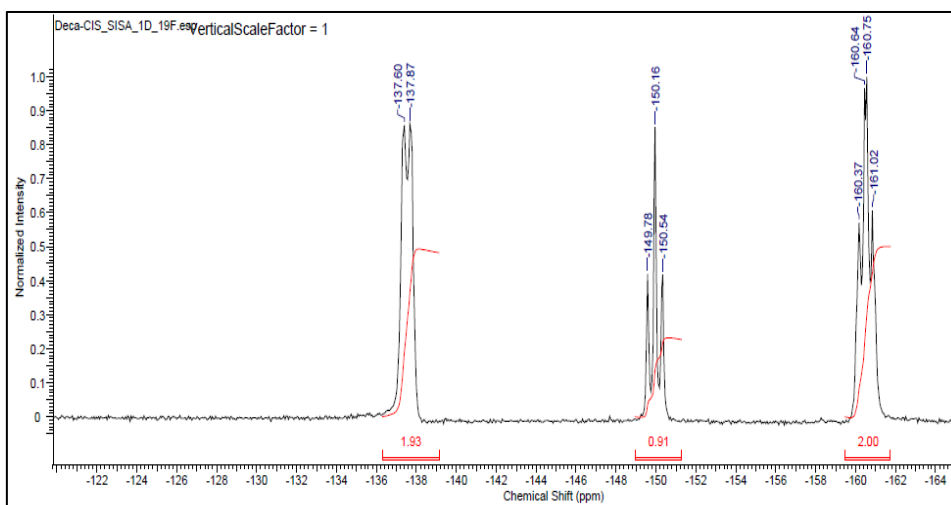

## Synthesis of C<sub>12</sub>F<sub>9</sub>-S-[RHB-peptide] (IIc)

### A) Synthesis of RHB-Tyr-Thr-Ile-Trp-Met-Pro-Glu-Asn-Pro-Arg-Pro-Gly-Thr-Pro-Cys-Asp-Ile-Phe-Thr-Asn-Ser-Arg-Gly-Lys-Arg-Ala-Ser-Asn-Gly-NH<sub>2</sub>

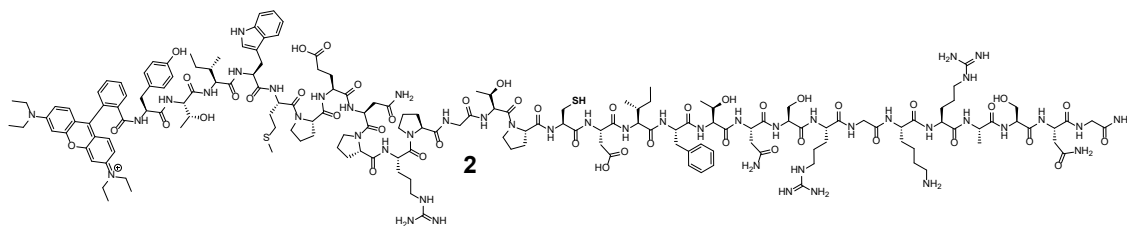

The automatically SPPS of YTIWMPENPRPGTPCDIFTNSRGKRASNG-NH<sub>2</sub> (RGV peptide) was carried out in CEM Discover Microwave Peptide Synthesizer following the Fmoc/tBu strategy and using Fmoc-Rink amide MBHA (200 mg, 0.73 mmol/g) as solid support. The peptide synthesis was monitored by RP-HPLC after the peptidyl resin cleavage of the intermediates (aliquot of 2 mg) using TFA/TIS/H<sub>2</sub>O (95:2.5:2.5) during 1 h. When the peptide synthesis was achieved, rhodamine B (RHB) was manually conjugated to the RGV peptide. This reaction was carried out with rhodamine B (210 mg, 3 equiv), HBTU (166 mg, 3 equiv) and DIEA (152  $\mu$ L, 6 equiv) in DMF for 45 min at room temperature. After completion of the synthesis, the resin was washed with dichloromethane (DCM) and the peptide was cleaved from the solid support with the concomitant amino acid side chains protecting groups elimination using the following acidolytic mixture: TFA/TIS/H<sub>2</sub>O (95:2.5:2.5) for 1.5 h. Then the peptide crude was purified by semi-preparative HPLC-MS using linear gradient from 90:10 to 30:70 of H<sub>2</sub>O/MeCN from over 15 min.

The purified peptide RHB-YTIWMPENPRPGTPCDIFTNSRGKRASNG-NH<sub>2</sub> was characterized by HPLC-MS: (H<sub>2</sub>O/MeCN from 90:10 to 30:70 over 8 min): *t<sub>R</sub>*: 4.9 and 5.2 min. *m/z* calculated for C<sub>169</sub>H<sub>247</sub>N<sub>46</sub>O<sub>44</sub>S<sub>2</sub><sup>+</sup> = 3691.18 Da, found: [M+3H]<sup>3+</sup>/3 = 1231.5 and [M+4H]<sup>4+</sup>/4 = 923.3. MALDI-TOF: *m/z* calculated for C<sub>169</sub>H<sub>247</sub>N<sub>46</sub>O<sub>44</sub>S<sub>2</sub><sup>+</sup> = 3691.18 Da, found [M+H]<sup>+</sup> = 3693.59 Da.

**Figure S11.** HPLC chromatogram of pure product. RP-HPLC: [linear gradient H<sub>2</sub>O/MeCN (90:10) to (30:70) over 8 min]. ESI-MS spectrum.

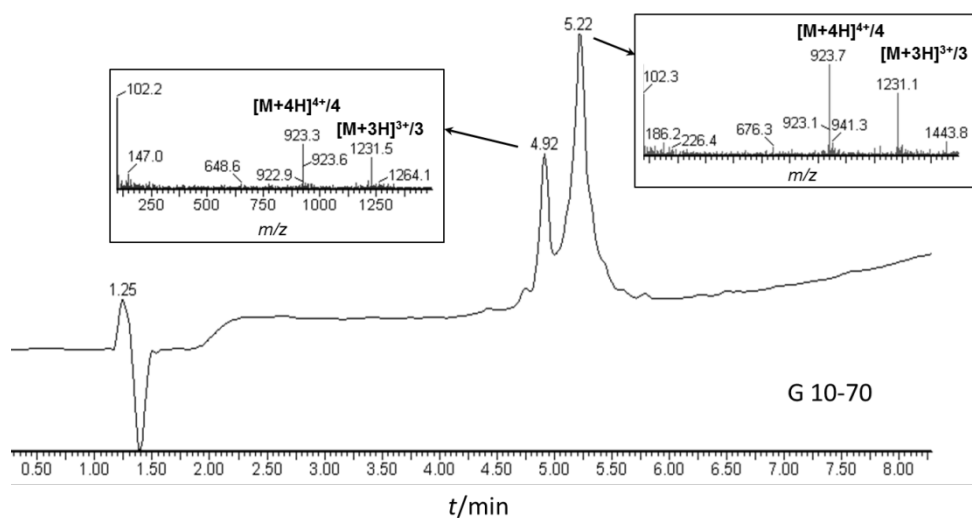

**Figure S12.** HPLC chromatogram of pure product IIc. ESI-MS spectrum.

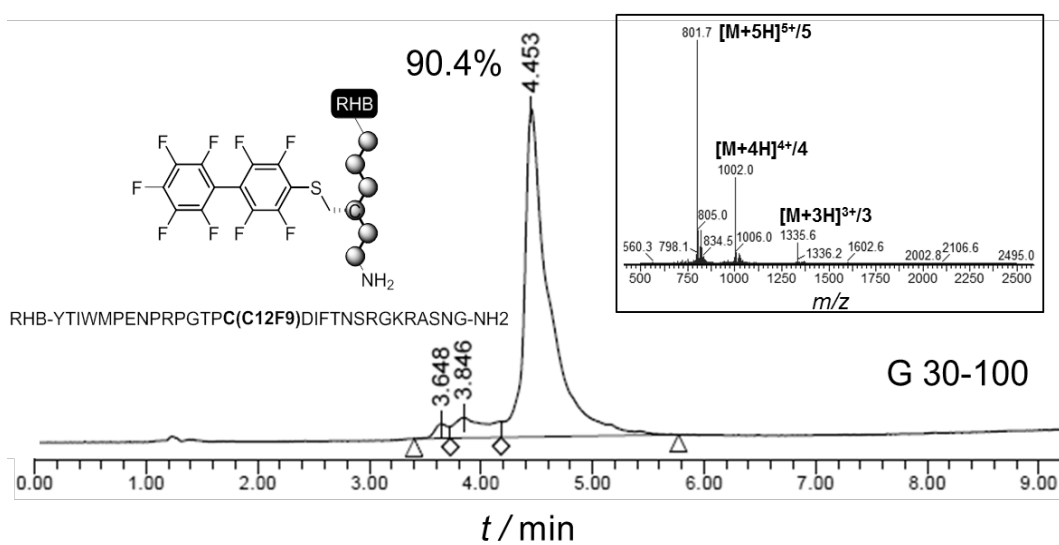

**Figure S13.** HPLC chromatogram and Mass spectrum of Anti-CD4

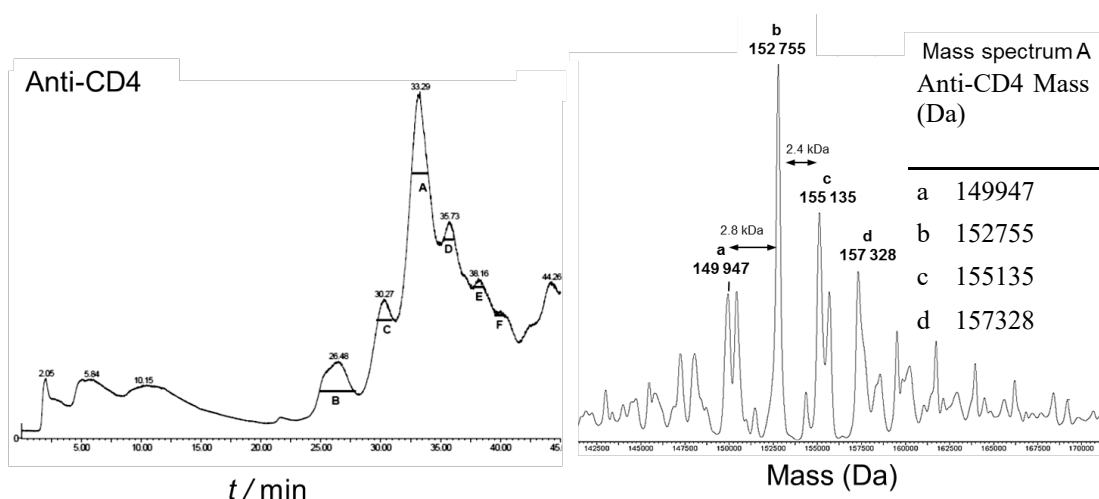

**Conjugate 1.** Anti-CD4-Cysteamine-C<sub>6</sub>F<sub>4</sub>-S-glutathione.

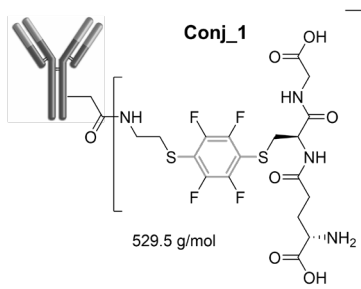

1 mL of Anti-CD4 solution (0.90 mg/mL, 6.0 μM), cystamine dihydrochloride (30 μg, 0.13 mM) and EDC·HCl (127 μg, 0.66 μmol, 0.66 mM). After PD-10 purification, 1 mL (0.85 mg/mL) of modified antibody was obtained. And then, it was treated with DTT (1 mg, 6.5 μmol). The solvent mixture was exchanged using a PD-10 column and approximately 1 mL (0.70 mg/mL) was obtained.

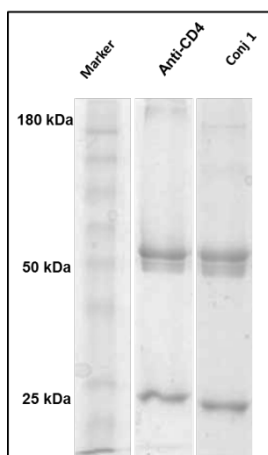

The previously synthesized C<sub>6</sub>F<sub>5</sub>-S-Glutathione (**Ia**) (2.0 mg, 4.2 μmol) was dissolved into DMF (50 μL) and it was added to the previously modified antibody solution (0.70 mg/mL). The reaction was left to react during 3 h at room temperature. After that, the crude was dialyzed (MWCO: 12-14,000) over PBS (10 mM Na<sub>2</sub>HPO<sub>4</sub>, 1.8 mM KH<sub>2</sub>PO<sub>4</sub>, 137 mM NaCl and 2.7 mM KCl, pH = 7.4) obtaining 1 mL of the conjugate (0.65 mg/mL). A sample of 0.64 mg/mL in water was diluted ½ with 1% formic acid aqueous solution to 2.1 μM. Then 12 μL was injected for MS analysis.



**Figure S14.** HPLC chromatogram and Mass spectrum of **Conjugate 1**

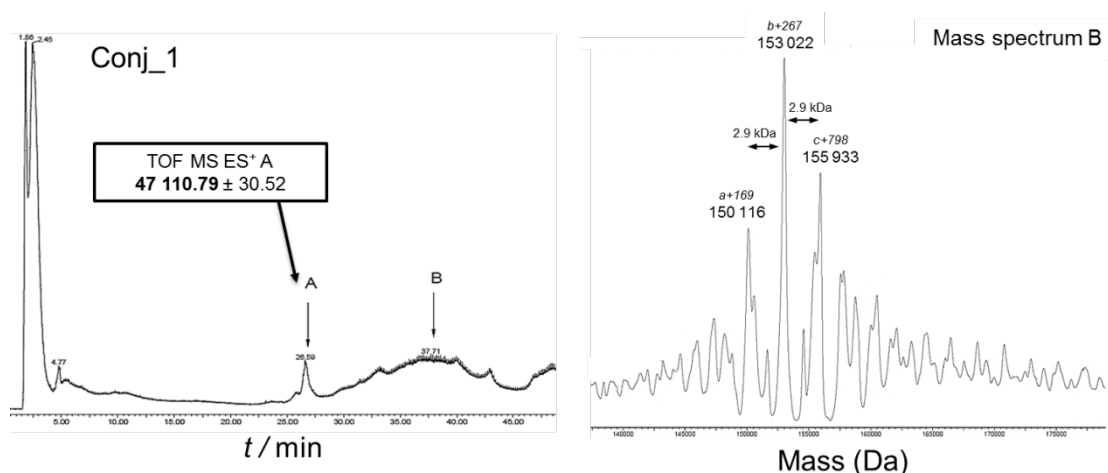

| Conj_1 detected | Mass (Da) | Anti-CD4 Mass (Da) | $\Delta_{\text{mass}}$ (Da) | MW  | DAR |
|-----------------|-----------|--------------------|-----------------------------|-----|-----|
| 1               | 150116    | 149947             | 169                         | 530 | 0,3 |
| 2               | 153022    | 152755             | 267                         |     | 0,5 |
| 3               | 155933    | 155135             | 798                         |     | 1,5 |

**Conjugate 2.** Anti-CD4-Cysteamine- $\text{C}_{12}\text{F}_8$ -S-glutathione.

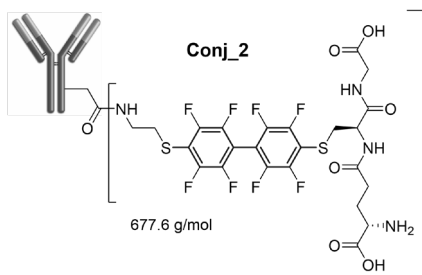

1 mL of Anti-CD4 solution (0.91 mg/mL, 6.0  $\mu\text{M}$ ), cystamine dihydrochloride (30  $\mu\text{g}$ , 0.13 mM) and EDC·HCl (127  $\mu\text{g}$ , 0.66  $\mu\text{mol}$ , 0.66 mM). After PD-10 purification, approximately 1 mL (0.90 mg/mL) of modified antibody was obtained. And then, it was treated with DTT (1 mg, 6.5  $\mu\text{mol}$ ). The solvent mixture was exchanged using a PD-10 column and approximately 1 mL (0.85 mg/mL) was obtained.

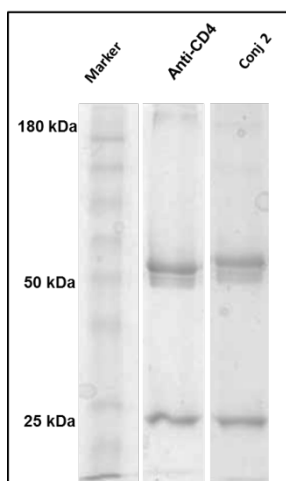

The previously synthesized  $\text{C}_{12}\text{F}_9$ -S-Glutathione (**IIa**) (2.0 mg, 3.2  $\mu\text{mol}$ ) was dissolved into DMF (50  $\mu\text{L}$ ) and it was added to the previously modified antibody solution (0.85 mg/mL). The reaction was left to react during 3 h at room temperature. After that, the crude was dialyzed (MWCO: 12-14,000) over PBS (10 mM  $\text{Na}_2\text{HPO}_4$ , 1.8 mM  $\text{KH}_2\text{PO}_4$ , 137 mM NaCl and 2.7 mM KCl, pH = 7.4) and over water obtaining 0.5 mL (0.64 mg/mL) and 0.5 mL (0.65 mg/mL) respectively. A sample of 0.64 mg/mL in water was diluted  $\frac{1}{2}$  with 1% formic acid aqueous solution to 2.1  $\mu\text{M}$ . Then 12  $\mu\text{L}$  was injected for MS analysis.

**Figure S15.** HPLC chromatogram and Mass spectrum of **Conjugate 2**

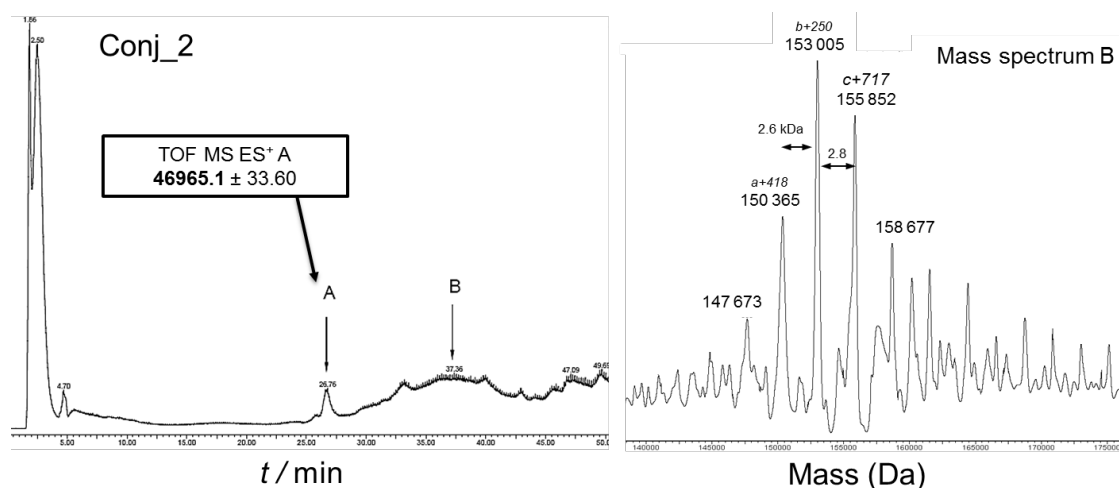

| Conj_2        | Mass   | Anti-CD4  | $\Delta_{\text{mass}}$ | MW    | DAR |
|---------------|--------|-----------|------------------------|-------|-----|
| detected (Da) |        | Mass (Da) | (Da)                   |       |     |
| 1             | 150365 | 149947    | 418                    | 677,6 | 0,6 |
| 2             | 153005 | 152755    | 250                    |       | 0,4 |
| 3             | 155852 | 155135    | 717                    |       | 1,1 |

**Conjugate 3.** Anti-CD4-Cysteamine- $\text{C}_{12}\text{F}_8$ -S-RHB-Peptide.

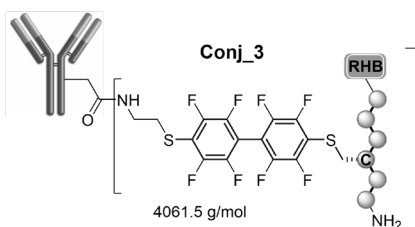

1 mL of the non-reduced cystamine modified antibody (0.60 mg/mL, 4.0  $\mu\text{M}$ ) was treated with DTT (1 mg, 6.5  $\mu\text{mol}$ ). The solvent mixture was exchanged using a PD-10 column and approximately 1.5 mL (0.44 mg/mL) was obtained.

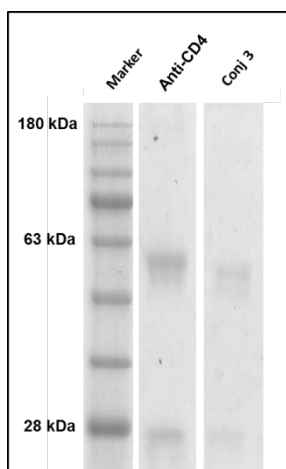

The previously synthesized  $\text{C}_{12}\text{F}_9$ -S-RHB-peptide (**IIb**) (1.0 mg, 0.25  $\mu\text{mol}$ ) was dissolved in DMF (80  $\mu\text{L}$ ) and TEA (2  $\mu\text{L}$ , 0.02  $\mu\text{mol}$ ) and it was added to 1 mL of the previously modified antibody solution (0.44 mg/mL). The reaction was left to react during 3 h at room temperature. After that, the crude was dialyzed (MWCO: 12-14,000) over PBS (10 mM  $\text{Na}_2\text{HPO}_4$ , 1.8 mM  $\text{KH}_2\text{PO}_4$ , 137 mM NaCl and 2.7 mM KCl, pH = 7.4) obtaining approximately 1.5 mL of the conjugate (0.49 mg/mL). Moreover, 0.5 mL of sample was dialyzed (MWCO: 12-14,000) in front of water in order to perform their mass analysis (0.33 mg/mL). A sample of 0.33 mg/mL in water was diluted  $\frac{1}{2}$  with 1% formic acid aqueous solution to 1.1  $\mu\text{M}$ . Then 12  $\mu\text{L}$  was injected for MS analysis.

**Figure S16.** HPLC chromatogram and Mass spectrum of **Conjugate 3**

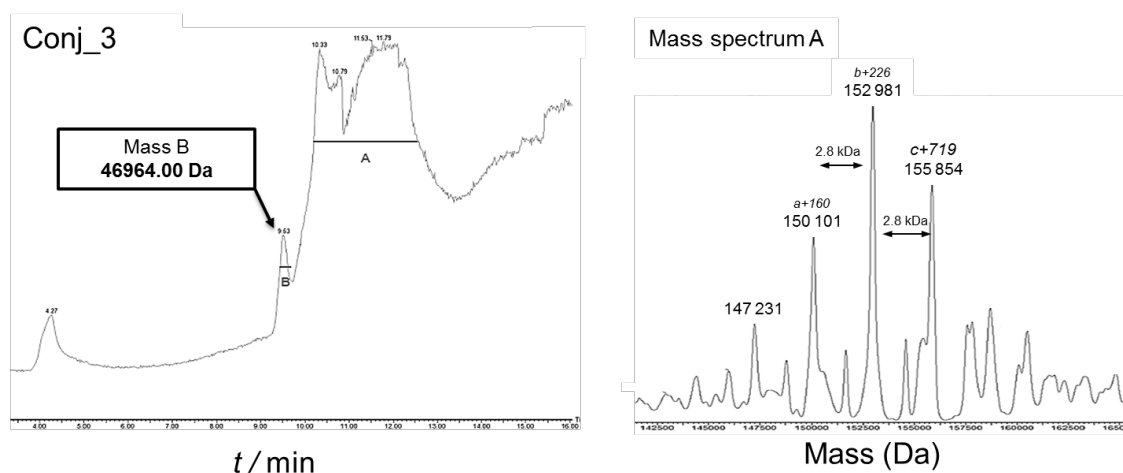

| Conj_3 | Mass detected (Da) | Anti-CD4 Mass (Da) | $\Delta_{\text{mass}}$ (Da) | MW     | DAR |
|--------|--------------------|--------------------|-----------------------------|--------|-----|
| 1      | 150101             | 149947             | 154                         | 4081,5 | 0,0 |
| 2      | 152981             | 152755             | 226                         |        | 0,1 |
| 3      | 155854             | 155135             | 719                         |        | 0,2 |

**Conjugate 4.** Anti-CD4-S-C<sub>6</sub>F<sub>4</sub>-S-Glutathione.

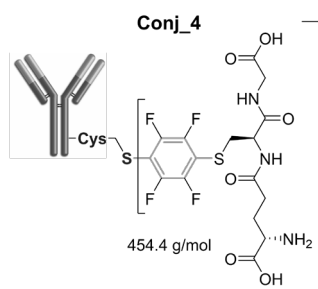

1 mL of Anti-CD4 solution (1.21 mg/mL, 8.1  $\mu$ M) was treated with DTT (4  $\mu$ g, 0.026  $\mu$ mol). After PD-10 purification, 1 mL of the reduced antibody (1.08 mg/mL) was treated with a solution of C<sub>6</sub>F<sub>5</sub>-S-Glutathione (**3**) (2.0 mg, 4.2  $\mu$ mol) in DMF (50  $\mu$ L). The reaction was left to react during 3 h at room temperature. After PD-10 purification, approximately 1 mL of the modified antibody was obtained

(0.91 mg/mL).

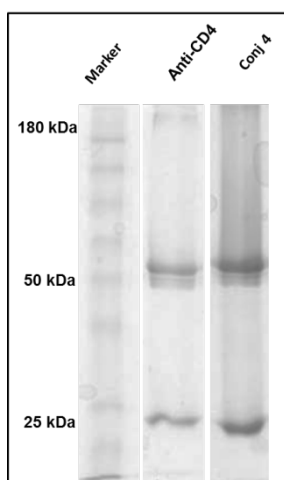

A sample of 0.78 mg/mL in water was diluted 1/5 with 1% formic acid aqueous solution to 1.0  $\mu$ M. Then 12  $\mu$ L was injected for MS analysis.

| Conj_4 | Mass detected (Da) | Anti-CD4 Mass (Da) | $\Delta_{\text{mass}}$ (Da) | MW    | DAR |
|--------|--------------------|--------------------|-----------------------------|-------|-----|
| 1      | 150107             | 149947             | 160                         | 454,4 | 0,4 |
| 2      | 152872             | 152755             | 117                         |       | 0,3 |
| 3      | 155730             | 155135             | 595                         |       | 1,3 |

**Figure S17.** HPLC chromatogram and Mass spectrum of **Conjugate 4**

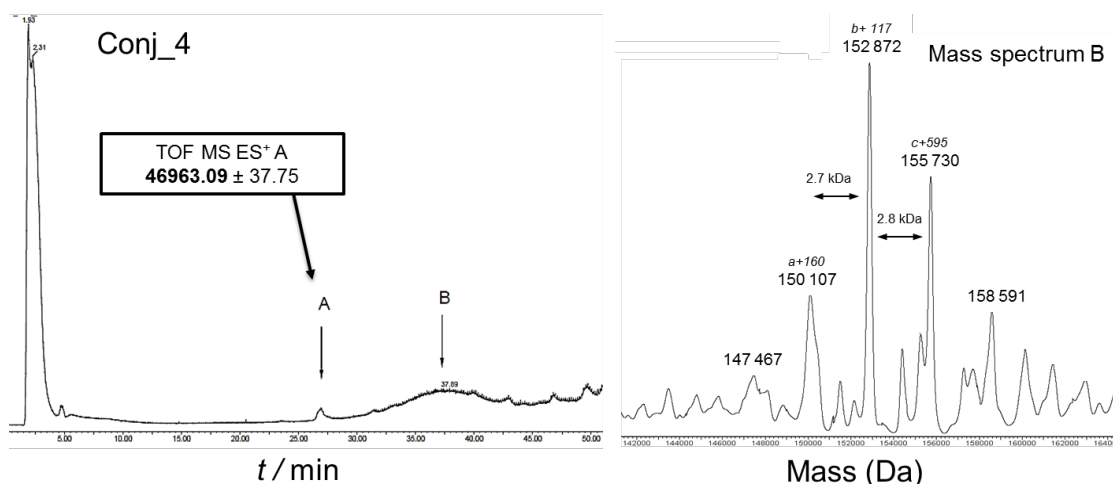

**Conjugate 5.** Anti-CD4-S-C<sub>12</sub>F<sub>8</sub>-S-Glutathione.

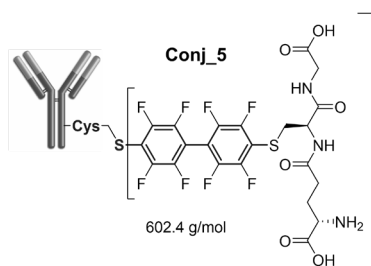

1 mL of Anti-CD4 solution (1.27 mg/mL, 8.5  $\mu$ M) was treated with DTT (4  $\mu$ g, 0.026  $\mu$ mol). After PD-10 purification, 1 mL of the reduced antibody (0.95 mg/mL) was treated with a solution of C<sub>12</sub>F<sub>9</sub>-S-Glutathione (**IIa**) (2.0 mg, 3.2  $\mu$ mol) in DMF (50  $\mu$ L). The reaction was left to react during 3 h at room temperature. After PD-10 purification, approximately 1 mL of the modified antibody

was obtained (0.80 mg/mL).

A sample of 0.80 mg/mL in water was diluted 1/5 with 1% formic acid aqueous solution to 1.1  $\mu$ M. Then 12  $\mu$ L was injected for MS analysis.

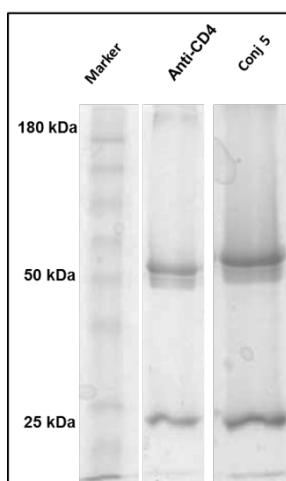

| Conj_5 detected (Da) | Mass | Anti-CD4 Mass (Da) | $\Delta_{\text{mass}}$ (Da) | MW    | DAR  |
|----------------------|------|--------------------|-----------------------------|-------|------|
| 1 149860             |      | 149947             | -87                         | 602,4 | -0,1 |
| 2 152802             |      | 152755             | 47                          |       | 0,1  |
| 3 155670             |      | 155135             | 535                         |       | 0,9  |

**Figure S18.** HPLC chromatogram and Mass spectrum of **Conjugate 5**

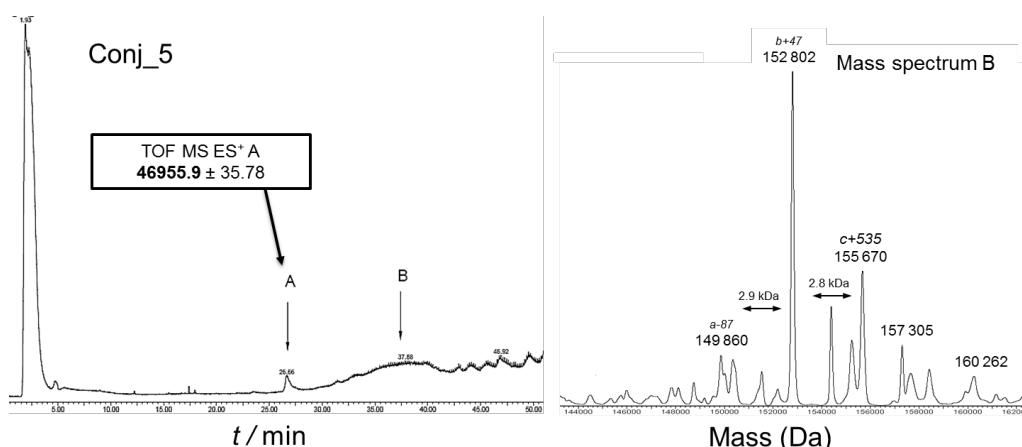

**Conjugate 6.** Anti-CD4-S-C<sub>12</sub>F<sub>8</sub>-S-RHB-Peptide.

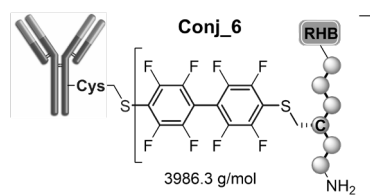

1 mL of Anti-CD4 solution (2.0 mg/mL, 8.5  $\mu$ M) was treated with DTT (4  $\mu$ g, 0.026  $\mu$ mol). After PD-10 purification, 1 mL of the reduced antibody (1.15 mg/mL) was treated with a solution of C<sub>12</sub>F<sub>9</sub>-S-RHB-peptide (**IIb**) (1.0 mg, 0.25  $\mu$ mol) dissolved in DMF (80  $\mu$ L) and TEA (2  $\mu$ L, 0.02  $\mu$ mol). The reaction was left to react during 1 h at 37  $^{\circ}$ C. After that, the crude was dialyzed (MWCO: 12-14,000) over PBS (10 mM Na<sub>2</sub>HPO<sub>4</sub>, 1.8 mM KH<sub>2</sub>PO<sub>4</sub>, 137 mM NaCl and 2.7 mM KCl, pH = 7.4) obtaining two fractions of 0.5 mL of conjugate (0.88 and 0.33 mg/mL). Moreover, 0.5 mL of the crude was dialyzed (MWCO: 12-14,000) in front of water in order to perform their mass analysis (0.34 mg/mL). A sample of 0.33 mg/mL in water was diluted  $\frac{1}{2}$  with 1% formic acid aqueous solution to 1.1  $\mu$ M. Then 12  $\mu$ L was injected for MS analysis.

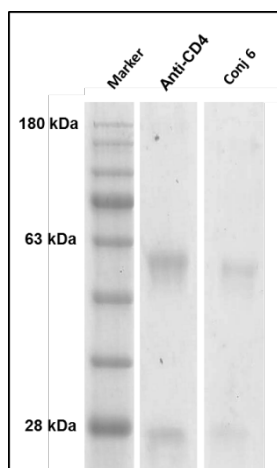

**Figure S19.** HPLC chromatogram and Mass spectrum of **Conjugate 5**

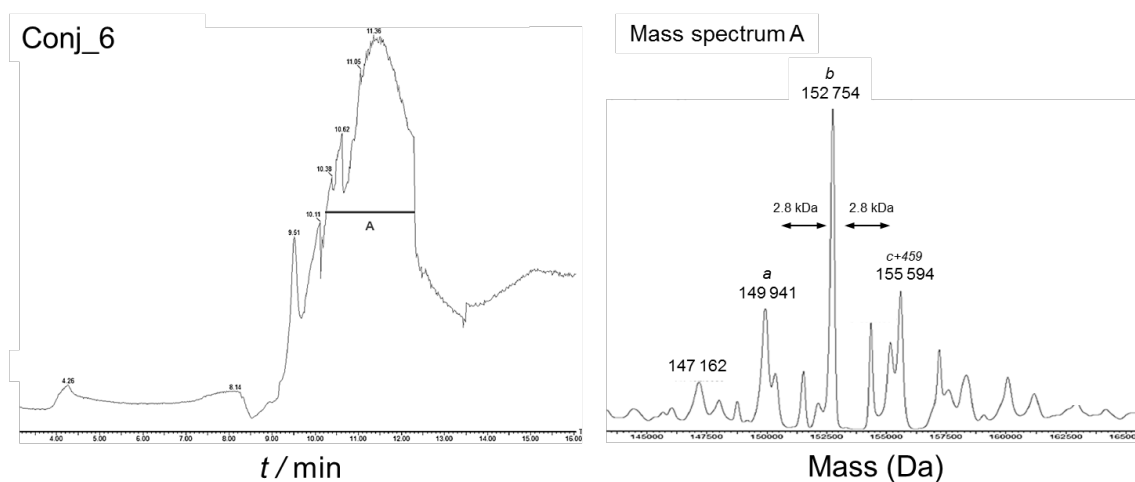

| Conj_6 | Mass detected (Da) | Anti-CD4 Mass (Da) | $\Delta_{\text{mass}}$ (Da) | MW     | DAR |
|--------|--------------------|--------------------|-----------------------------|--------|-----|
| 1      | 149941             | 149947             | -6                          | 3986,3 | 0,0 |
| 2      | 152754             | 152755             | -1                          |        | 0,0 |
| 3      | 155594             | 155135             | 459                         |        | 0,1 |

**Figura S20.** Optimized geometric structures DFT/B3LYP level: (Ia) S-(perfluorophenyl)-L-cysteine, (Ib) S-(perfluoro-[1,1'-biphenyl]-4-yl)-L-cysteine, (IIa) S-(perfluorophenyl)-L-glutathione, and (IIb) S-(perfluoro-[1,1'-biphenyl]-4-yl)-L-glutathione.

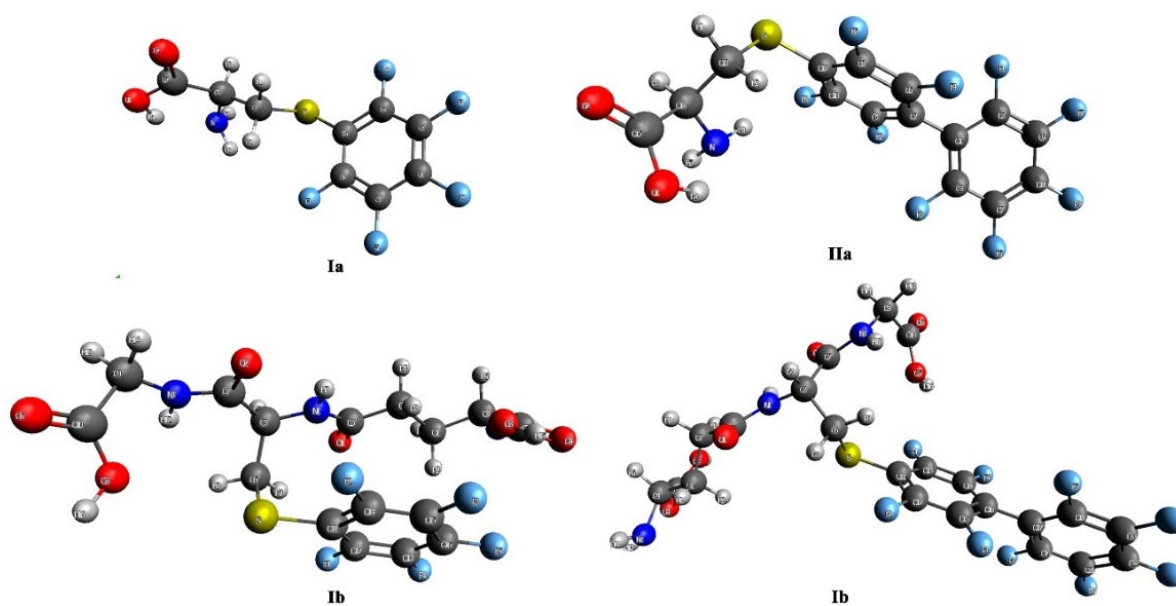

**Figura S21** Optimized geometric structures DFT/B3LYP level of S-(perfluorophenyl)-L-cysteine (**Ia**).

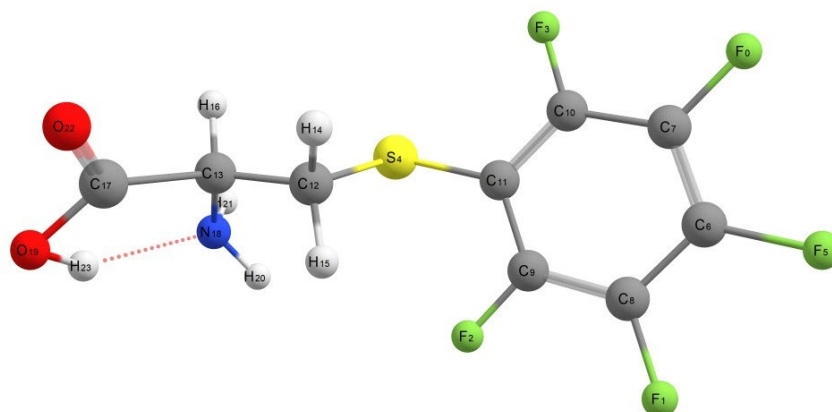

**Table S11.** Selected bond lengths (Å) of compound **Ia** using DFT-method from ORCA calculations.

| Bond      | Length(Å) | Bond      | Length(Å) | Bond      | Length(Å) |
|-----------|-----------|-----------|-----------|-----------|-----------|
| C(1)-C(2) | 1.387     | C(1)-F(5) | 1.330     | S-C(7)    | 1.833     |
| C(1)-C(3) | 1.389     | C(2)-F(1) | 1.333     | C(7)-H(1) | 1.087     |
| C(2)-C(5) | 1.388     | C(3)-F(2) | 1.333     | C(7)-H(2) | 1.091     |
| C(3)-C(4) | 1.385     | C(4)-F(3) | 1.338     | C(7)-C(8) | 1.525     |
| C(4)-C(6) | 1.395     | C(5)-F(4) | 1.333     | C(8)-H(3) | 1.093     |
| C(5)-C(6) | 1.395     | C(6)-S    | 1.767     | C(8)-N    | 1.467     |
| C(8)-C(9) | 1.547     | N-H(4)    | 1.013     | N-H(5)    | 1.011     |
| C(9)-O(2) | 1.201     | C(9)-O(1) | 1.333     | O(1)-H(6) | 0.987     |

**Table S2.** Selected bond angles (°) of compound **Ia** using DFT-method from ORCA calculations.

| Angle          | Degree (°) | Angle          | Degree (°) |
|----------------|------------|----------------|------------|
| C(6)-S-C(7)    | 100.24     | C(2)-C(1)-C(3) | 119.91     |
| F(5)-C(1)-C(3) | 119.99     | F(5)-C(1)-C(2) | 120.10     |
| F(1)-C(2)-C(1) | 119.78     | F(1)-C(2)-C(5) | 120.48     |
| C(1)-C(2)-C(5) | 119.74     | C(1)-C(3)-C(4) | 119.49     |
| F(2)-C(3)-C(4) | 120.65     | C(3)-C(4)-C(6) | 121.97     |
| F(2)-C(3)-C(1) | 119.86     | F(3)-C(4)-C(6) | 120.08     |
| F(3)-C(4)-C(3) | 117.95     | F(4)-C(5)-C(6) | 120.52     |
| F(4)-C(5)-C(2) | 117.85     | C(2)-C(5)-C(6) | 121.63     |
| S-C(6)-C(4)    | 121.77     | C(4)-C(6)-C(5) | 117.26     |
| S-C(6)-C(5)    | 120.94     | H(1)-C(7)-H(2) | 109.17     |
| C(8)-C(7)-H(2) | 110.06     | S-C(7)-H(2)    | 109.30     |
| C(8)-C(7)-H(1) | 109.56     | S-C(7)-H(1)    | 109.68     |
| S-C(7)-C(8)    | 109.06     | H(3)-C(8)-N    | 109.06     |
| C(7)-C(8)-N    | 114.37     | H(3)-C(8)-C(9) | 105.19     |
| C(7)-C(8)-C(9) | 108.55     | C(9)-C(8)-N    | 110.32     |
| C(7)-C(8)-H(3) | 108.95     | O(1)-C(9)-O(2) | 123.78     |
| C(8)-C(9)-O(2) | 122.56     | C(8)-C(9)-O(1) | 113.65     |
| H(4)-N-H(5)    | 107.58     | C(8)-N-H(4)    | 111.72     |
| C(8)-N-H(5)    | 112.37     | C(9)-O(1)-H(6) | 105.06     |

**Figure S22.** Optimized geometric structures DFT/B3LYP level of S-(perfluorophenyl)-L-glutathione (Ib).

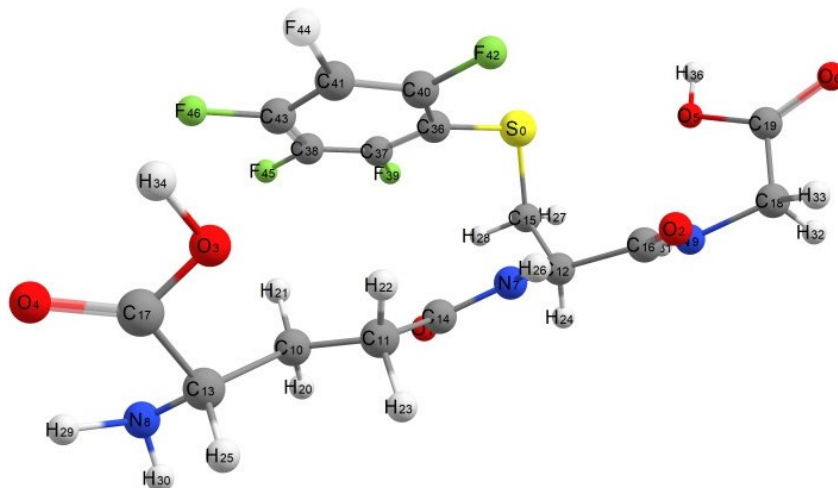

**Table S3.** Selected bond lengths (Å) of compound Ib using DFT-method from ORCA calculations.

| Bond         | Length(Å) | Bond        | Length(Å) | Bond        | Length(Å) |
|--------------|-----------|-------------|-----------|-------------|-----------|
| C(11)-C(10)  | 1.5234    | C(12)-N(7)  | 1.4397    | C(13)-N(8)  | 1.4548    |
| C(13)-C(10)  | 1.5375    | C(14)-N(7)  | 1.3563    | C(14)-C(11) | 1.5192    |
| C(14)-O(1)   | 1.2225    | C(15)-C(12) | 1.5391    | C(15)-S(0)  | 1.8247    |
| C(16)-C(12)  | 1.5326    | C(16)-N(9)  | 1.3592    | C(16)-O(2)  | 1.2170    |
| C(17)-C(13)  | 1.5206    | C(17)-O(4)  | 1.2024    | C(17)-O(3)  | 1.3517    |
| C(18)-N(9)   | 1.4421    | C(19)-C(18) | 1.5202    | C(19)-O(6)  | 1.1995    |
| C(19)-O(5)   | 1.3512    | H(20)-C(10) | 1.0897    | H(21)-C(10) | 1.0909    |
| H(22)-C(11)  | 1.0891    | H(23)-C(11) | 1.0964    | H(24)-C(12) | 1.0967    |
| H(25)-C(13)  | 1.1052    | H(26)-N(7)  | 1.0105    | H(27)-C(15) | 1.0906    |
| H(28)-C(15)  | 1.0855    | H(29)-N(8)  | 1.0127    | H(30)-N(8)  | 1.0111    |
| H(31)-N(9)   | 1.0060    | H(32)-C(18) | 1.0919    | H(33)-C(18) | 1.0885    |
| H(34)-O(3)   | 0.9707    | H(35)-O(5)  | 0.9707    | C(36)-S(0)  | 1.7691    |
| C(37)-C(36)  | 1.3948    | C(38)-C(37) | 1.3860    | F(39)-C(37) | 1.3345    |
| C(40)-C(36)  | 1.3948    | F(42)-C(40) | 1.3342    | C(43)-C(41) | 1.3863    |
| C(43)-C(38)  | 1.3876    | F(44)-C(41) | 1.3375    | F(45)-C(38) | 1.3323    |
| zF(46)-C(43) | 1.3309    |             |           |             |           |

**Table S4** Selected bond angles (°) of compound Ib using DFT-method from ORCA calculations.

| Angle             | Degree (°) | Angle             | Degree (°) |
|-------------------|------------|-------------------|------------|
| C(15)-S(0)-C(36)  | 101.75     | C(17)-O(3)-H(34)  | 107.39     |
| C(19)-O(5)-H(35)  | 107.26     | C(14)-N(7)-H(26)  | 121.99     |
| C(12)-N(7)-H(26)  | 115.25     | C(12)-N(7)-C(14)  | 122.63     |
| H(29)-N(8)-H(30)  | 109.34     | C(13)-N(8)-H(30)  | 111.17     |
| C(13)-N(8)-H(29)  | 110.68     | C(16)-N(9)-H(31)  | 118.12     |
| C(18)-N(9)-H(31)  | 117.60     | C(16)-N(9)-C(18)  | 121.35     |
| C(13)-C(10)-H(20) | 107.12     | C(13)-C(10)-H(21) | 109.26     |
| C(11)-C(10)-H(20) | 108.35     | C(11)-C(10)-C(13) | 115.28     |
| H(20)-C(10)-H(21) | 105.43     | C(11)-C(10)-H(21) | 110.86     |
| C(10)-C(11)-H(22) | 111.71     | C(10)-C(11)-H(23) | 109.77     |
| C(14)-C(11)-H(22) | 109.69     | C(10)-C(11)-C(14) | 112.23     |
| C(14)-C(11)-H(23) | 106.98     | H(22)-C(11)-H(23) | 106.17     |
| C(16)-C(12)-H(24) | 108.97     | C(15)-C(12)-C(16) | 112.15     |
| N(7)-C(12)-C(16)  | 107.07     | N(7)-C(12)-H(24)  | 109.42     |
| C(15)-C(12)-H(24) | 106.56     | N(7)-C(12)-C(15)  | 112.62     |
| C(10)-C(13)-H(25) | 107.81     | C(17)-C(13)-H(25) | 104.00     |
| N(8)-C(13)-H(25)  | 113.11     | N(8)-C(13)-C(10)  | 109.72     |
| C(10)-C(13)-C(17) | 114.46     | N(8)-C(13)-C(17)  | 107.74     |



|                   |        |                   |        |
|-------------------|--------|-------------------|--------|
| N(7)-C(14)-C(11)  | 114.72 | O(1)-C(14)-C(11)  | 123.36 |
| O(1)-C(14)-N(7)   | 121.91 | H(27)-C(15)-H(28) | 107.64 |
| C(12)-C(15)-H(28) | 108.97 | S(0)-C(15)-H(28)  | 110.10 |
| C(12)-C(15)-H(27) | 111.03 | S(0)-C(15)-H(27)  | 104.29 |
| S(0)-C(15)-C(12)  | 114.55 | N(9)-C(16)-C(12)  | 114.93 |
| O(2)-C(16)-C(12)  | 121.87 | O(2)-C(16)-N(9)   | 123.21 |
| O(3)-C(17)-O(4)   | 122.30 | O(4)-C(17)-C(13)  | 124.83 |
| O(3)-C(17)-C(13)  | 112.83 | H(32)-C(18)-H(33) | 107.54 |
| C(19)-C(18)-H(33) | 107.45 | N(9)-C(18)-H(33)  | 108.25 |
| C(19)-C(18)-H(32) | 107.16 | N(9)-C(18)-H(32)  | 110.90 |
| N(9)-C(18)-C(19)  | 115.24 | O(6)-C(19)-C(18)  | 123.45 |
| O(5)-C(19)-C(18)  | 112.92 | O(5)-C(19)-O(6)   | 123.61 |
| S(0)-C(36)-C(37)  | 122.28 | C(37)-C(36)-C(40) | 117.25 |
| S(0)-C(36)-C(40)  | 120.40 | C(36)-C(37)-F(39) | 120.18 |
| C(36)-C(37)-C(38) | 121.86 | C(38)-C(37)-F(39) | 117.96 |
| C(43)-C(38)-F(45) | 119.79 | C(37)-C(38)-F(45) | 120.64 |
| C(37)-C(38)-C(43) | 119.56 | C(36)-C(40)-F(42) | 120.47 |
| C(43)-C(41)-F(44) | 119.70 | C(41)-C(43)-F(46) | 120.03 |
| C(38)-C(43)-F(46) | 120.14 | C(38)-C(43)-C(41) | 119.83 |

Figura S23. Optimized geometric structures DFT/B3LYP level of S-(perfluoro-[1,1'-biphenyl]-4-yl)-L-cysteine (IIa).

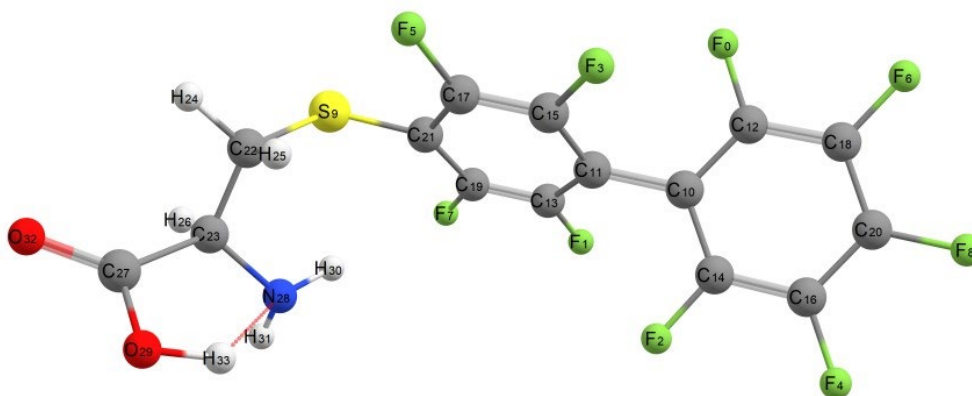

Figura S24. Optimized geometric structures DFT/B3LYP level of S-(perfluoro-[1,1'-biphenyl]-4-yl)-L-glutathione (IIb).

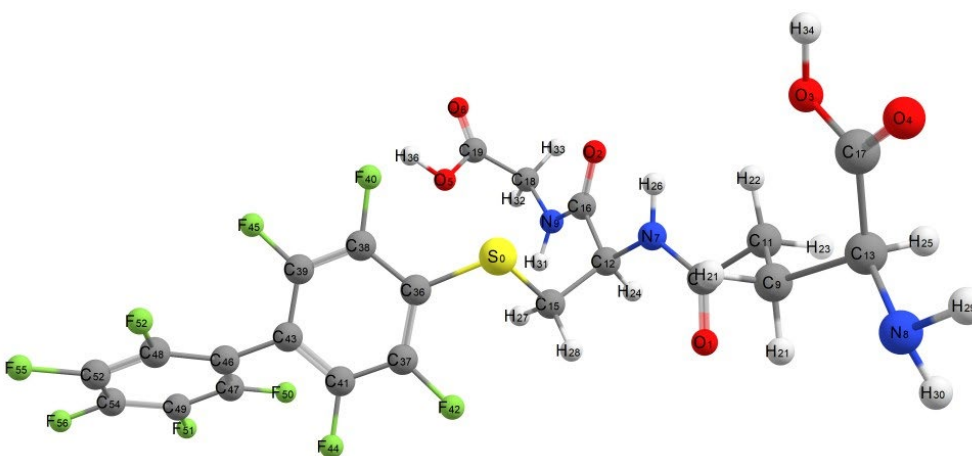

Supplement: Supplementary file 1 [file supplementary]
